# Supplementary material
Source: PubMed Central journal article supplement (PMC5805483)
Supplement: NIHMS934153-supplement-Figures_1-4.pdf [file NIHMS934153-supplement-Figures_1-4.pdf]

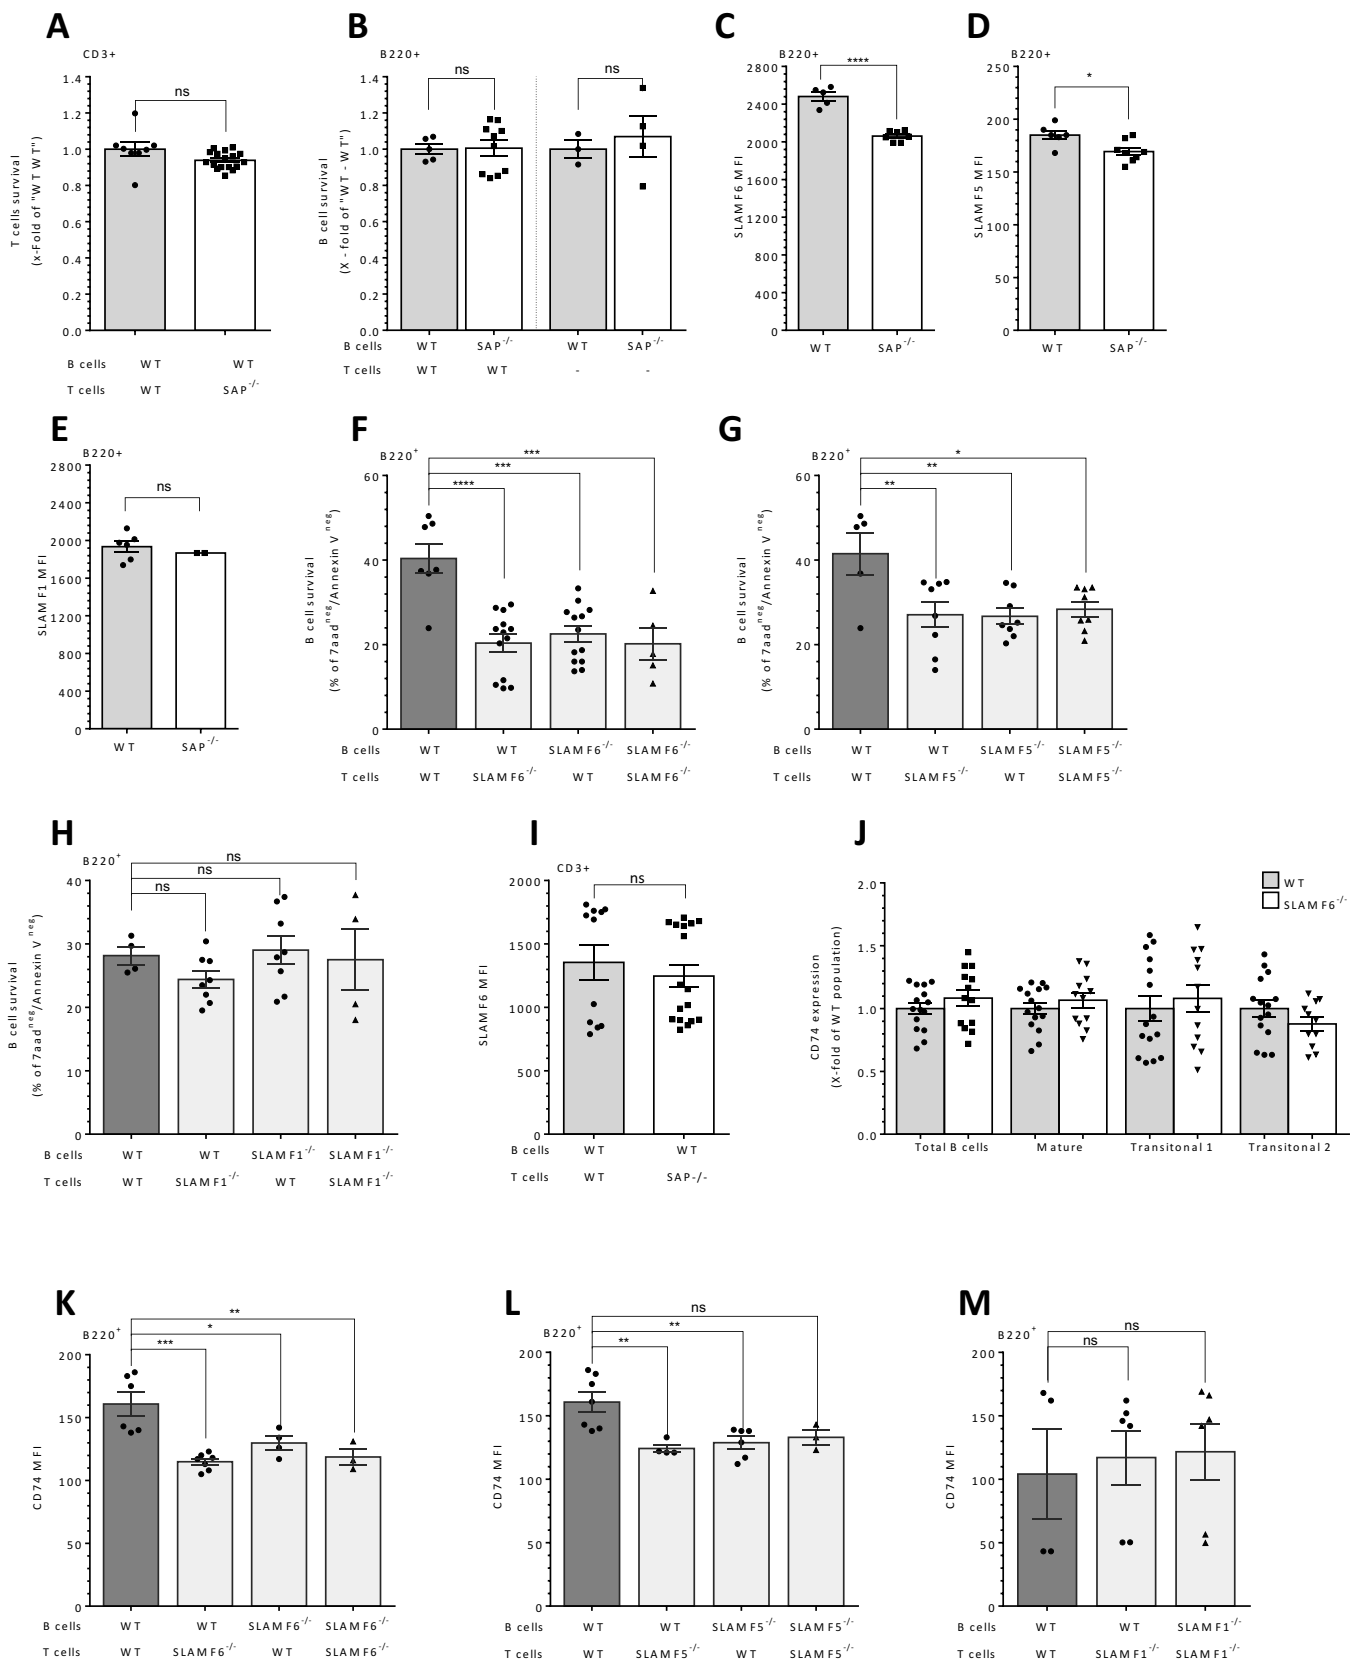

### Supplementary Figure 1- SAP and SLAMs in B cell maintenance

**(A)** Purified naïve wt B cells were cultured at 1:1 ratio with  $5 \times 10^6$  wt or SAP<sup>-/-</sup> T cells. After 24 hours, the T cells were analyzed by flow cytometry for T cell survival. Results are shown as fold of change compared to “wt B cells and wt T cells” culture. N=7 **(B)** Purified wt or SAP<sup>-/-</sup> derived B cells were cultured alone or at 1:1 ratio with  $5 \times 10^6$  wt T cells. After 24 hours, the B cells were analyzed by flow cytometry for cell survival. Results are shown as fold of change compared to “w B cells and wt T cells” (left) or compared to wt B cells alone (left). N=3. **(C-E)** Fresh wt and SAP<sup>-/-</sup> derived mature naïve B cells were analyzed by flow cytometry for **(C)** SLAMF6 N=3 , **(D)** SLAMF5 N=3 and **(E)** SLAMF1 N=1 surface expression. Results are shown as the SLAMs MFI. Purified naïve wt or SLAMF6<sup>-/-</sup> N=4. **(F)** or SLAMF5<sup>-/-</sup> N=3. **(G)** or SLAMF1<sup>-/-</sup> N=2. **(H)** B cells were cultured at 1:1 ratio with  $5 \times 10^6$  wt or SLAMF6<sup>-/-</sup> / SLAMF5<sup>-/-</sup> or SLAMF1<sup>-/-</sup> T cells. After 24 hours, the B cells were analyzed by flow cytometry for B cell survival (Results are shown as the percentage of live B cells (double negative to Annexin V/7AAD). **(I)** Naïve wt B cells and wt or SAP<sup>-/-</sup> T splenocytes were cultured alone or at a 1:1 ratio with  $5 \times 10^6$  wt or SAP<sup>-/-</sup> T cells. After 24 hours, cells were analyzed by flow cytometry for SLAMF6 expression on T cells (CD3<sup>+</sup> gate). Results shown as SLAMF6 MFI. N=4 **(J)** Wt and SLAMF6<sup>-/-</sup> splenocytes were analyzed by flow cytometry for surface CD74 expression on B cell populations; Total B cells (B220<sup>+</sup>); mature population (B220<sup>+</sup>, CD21<sup>int</sup>CD24<sup>low</sup>), Transitional 1 (B220<sup>+</sup>, CD21<sup>low</sup>CD24<sup>high</sup>) and Transitional 2 (B220<sup>+</sup>, CD21<sup>high</sup>CD24<sup>high</sup>CD23<sup>+</sup>), results are shown as CD74 surface expression as X-fold of WT populations. N=4. **(K-M)** Purified naïve wt or SLAMF6<sup>-/-</sup> (N=6) **(K)**, SLAMF5<sup>-/-</sup> (N=3) **(L)** or SLAMF1<sup>-/-</sup> (N=2). **(M)** B cells were cultured at 1:1 ratio with  $5 \times 10^6$  wt or the respective knock out T cells. After 24 hours, the B cells were analyzed by flow cytometry for CD74 expression (results are shown as CD74 MFI).

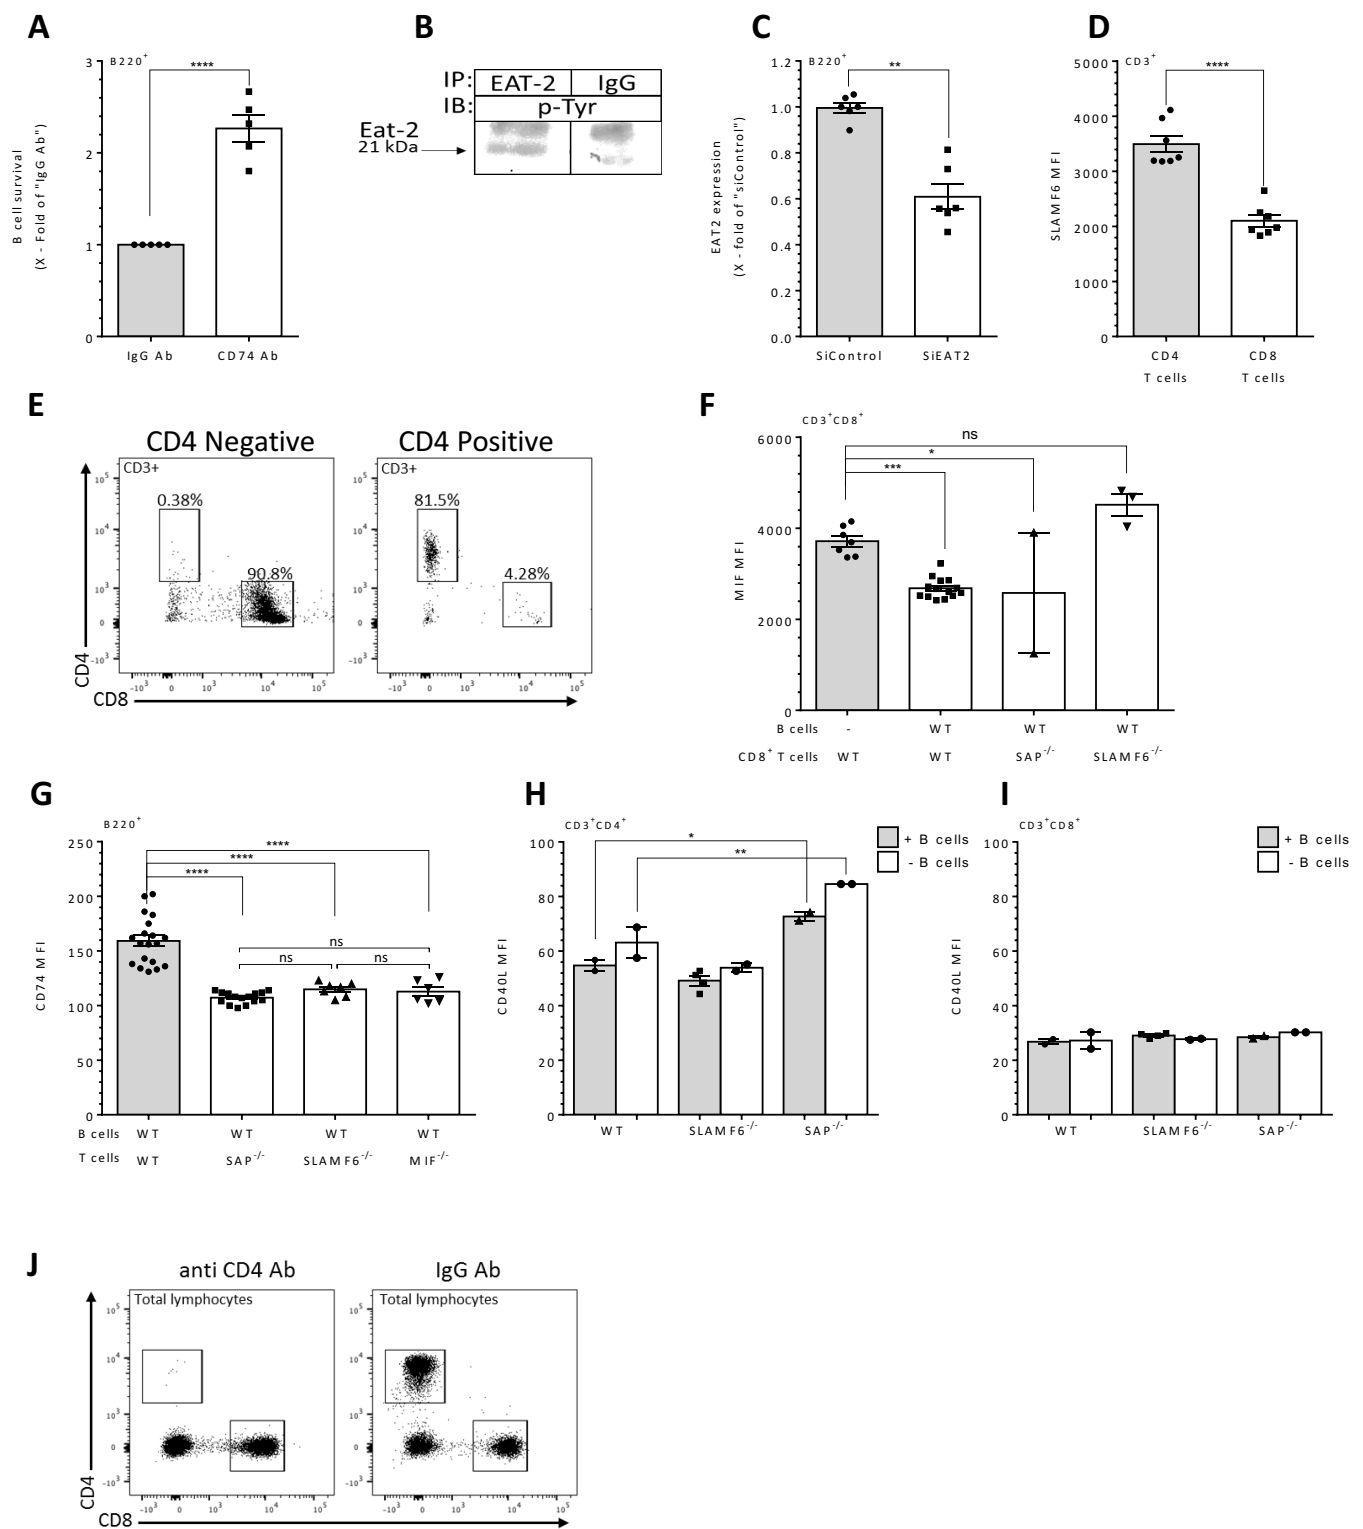

### Supplementary Fig 2- Characterization of CD74 and SLAMF6 in T cell function

**(A)** Naïve mature wt B cells were activated with anti-CD74 or IgG control antibodies for 18 hours. Cells were then analyzed for B cell survival by Annexin V/7AAD staining on the B220<sup>+</sup> gate. N=2 **(B)** Purified wt B splenocytes were lysed, and EAT-2 was immunoprecipitated. Proteins were separated by 12% SDS-PAGE and analyzed for p-Tyr expression n=2 . **(C)** Naïve B cells were treated with siRNA EAT2 or si control and were co-cultured with untreated naïve T cells. After 48 hrs, the cells were stained for EAT2. N=2 **(D)** Splenocytes were stained for CD3, CD4, CD8 or SLAMF6. Graph shows SLAMF6 expression on T cells (MFI). **(E)** Naïve or SAP<sup>-/-</sup> splenocytes were harvested and enriched first for B220<sup>+</sup> by BD bioscience magnetic beads. The negative fraction was further enriched for CD4<sup>+</sup> by anti-CD4 magnetic beads. Following the separation the cells were stained for CD3<sup>+</sup>, CD4<sup>+</sup> and CD8<sup>+</sup>. Representative dot plots of CD3<sup>+</sup> cells: left; CD4 beads negative fraction, right; CD4 beads positive fraction. **(F)** Naïve wt / SAP<sup>-/-</sup> /SLAMF6<sup>-/-</sup> T splenocytes were cultured alone or at a 1:1 ratio with 5x10<sup>6</sup> wt B cells. After 24 hours expression of MIF in CD3<sup>+</sup>CD4<sup>+</sup> was analyzed by flow cytometry. N=2 **(G)** Purified naïve wt B cells were cultured at 1:1 ratio with 5x10<sup>6</sup> wt / SAP<sup>-/-</sup> / SLAMF6<sup>-/-</sup> or MIF<sup>-/-</sup> T cells. After 24 hours B cells were analyzed by Flow cytometry for CD74 cell surface expression. Graph shows CD74 MFI levels. N=8 **(H-I)** Purified naïve 5x10<sup>6</sup> wt / SAP<sup>-/-</sup> or SLAMF6<sup>-/-</sup> CD4<sup>+</sup> T cells, **(H)** or CD8<sup>+</sup> T cells **(I)** cells were cultured alone or with WT B cells. Following 24 hours, CD40L expression was analyzed on the T cells by flow cytometry. **(J)** Wt mice were i.v. injected with 150 µg/ml anti-CD4 or IgG control Abs diluted in sterile PBS to a final volume of 200 µl. Mice were bled and stained for CD8<sup>+</sup>CD4<sup>+</sup> cells to verify CD4 depletion. A representative dot plot is shown. In all graphs, each dot represents a biological repeat. N represents the number of experiments. Bars showing SEM. ns p ≥ 0.05, \* p < 0.05, \*\* p < 0.01, \*\*\* p < 0.001, \*\*\*\* p < 0.0001

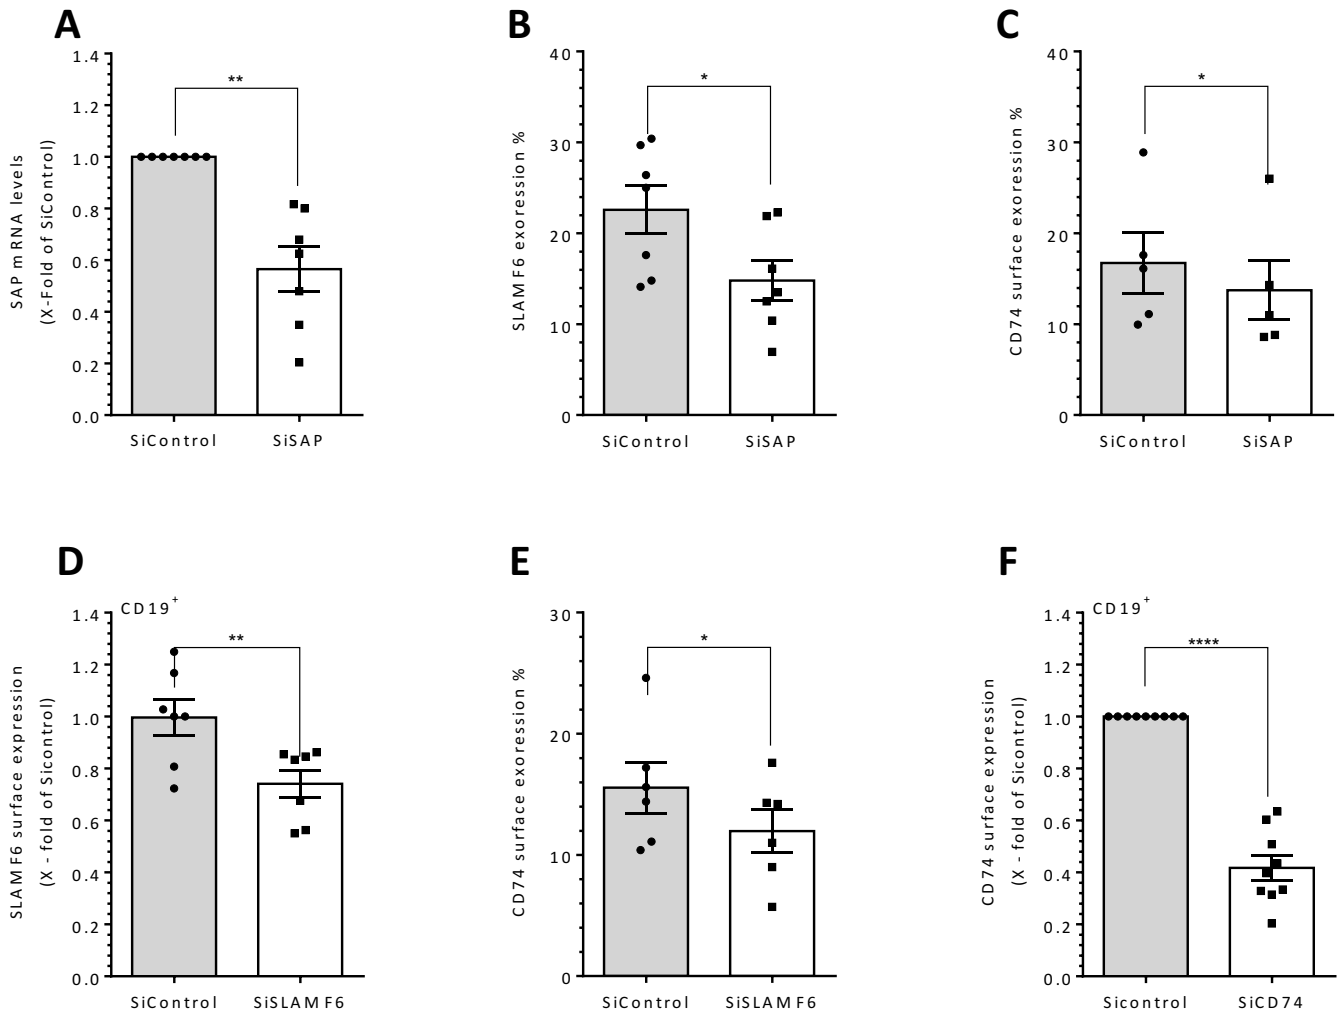

### Supplementary Figure 3-siRNA in human PB B cells

(A-F) Healthy human PB B cells were co-cultured with healthy human (from the same donor) PB T cells that were treated with control scrambled (siControl) or SAP (siSAP) (A-C) SLAMF6 (siSLAMF6) (D,E), or CD74 (siCD74) (F) siRNA. (A) Following 24 hours of incubation RNA was purified and SAP mRNA levels were analyzed by qRT-PCR. Following 48 hr cell surface expression of SLAMF6 (B,D) or CD74 (C,E,F) on B cells. Results are shown as fold change relative to the siControl; bars indicate SEM, Each dot represents a biological repeat. \*\* $p < 0.01$ , \*\*\*\* $p < 0.0001$ . N=3

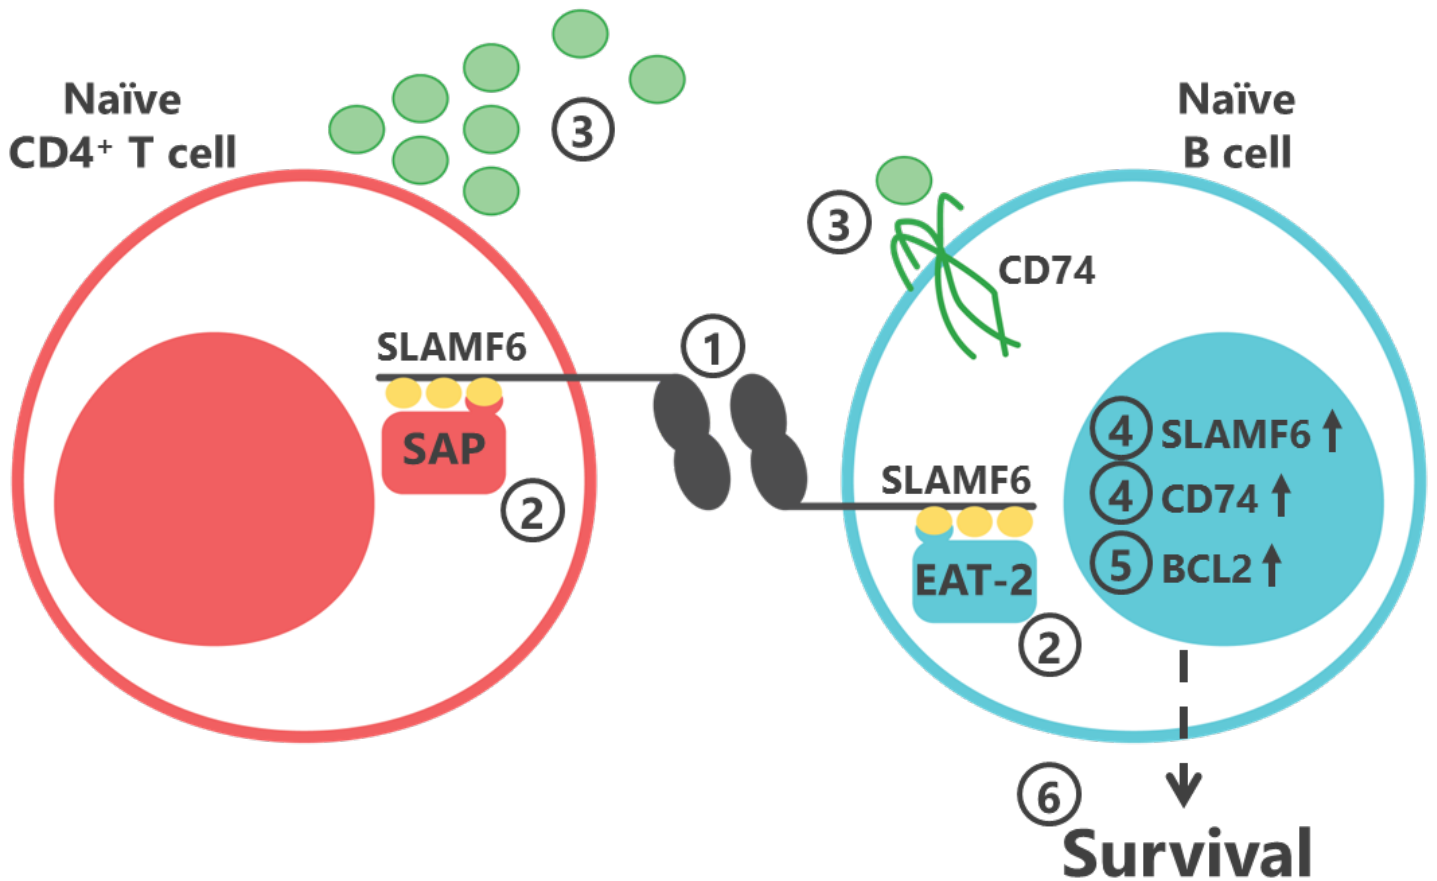

#### Supplementary figure 4 – Visual Abstract

(1) SLAMF6 receptors mediate the interaction of naïve B and CD4<sup>+</sup> T cells. (2) SLAMF6 in B cells recruits EAT-2 while SLAMF6 in T cells recruits SAP. This interaction induces a signaling cascade in (3) T cells leading to mif secretion. Mif then binds CD74 receptor on B cells leading to a downstream positive feedback loop (4) of SLAMF6 and CD74 elevation. This consequently (5) leads to an increase in BCL-2 and to (6) B cell survival.
